# Supplementary material
Source: PubMed Central journal article supplement (PMC3383229)

# A Dorsal movements

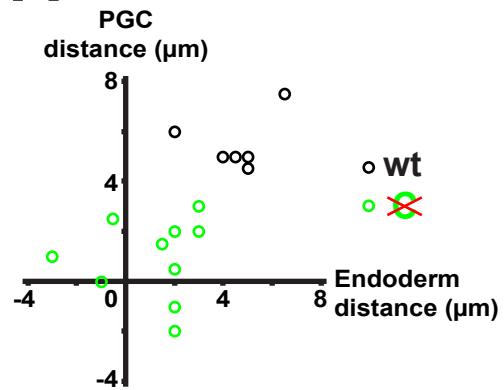

Supplement: supp_dev.079863_DEV079863FigS2.pdf [file supp_dev.079863_DEV079863FigS2.pdf]

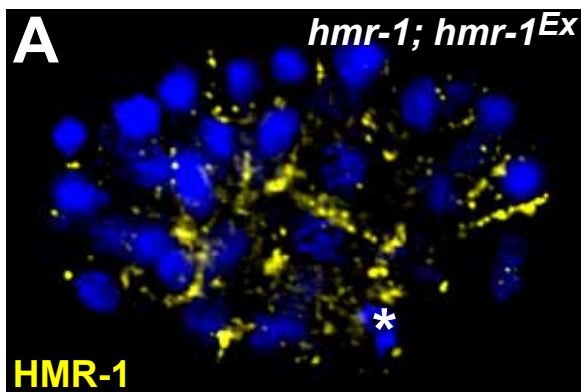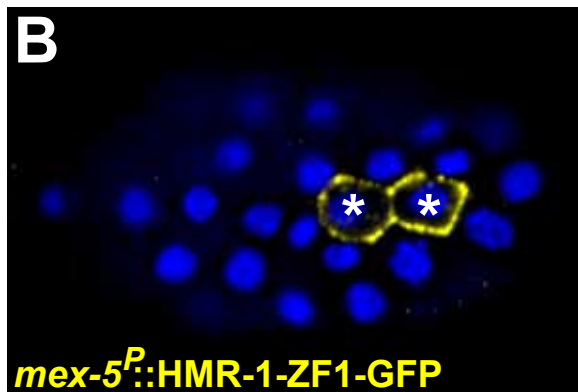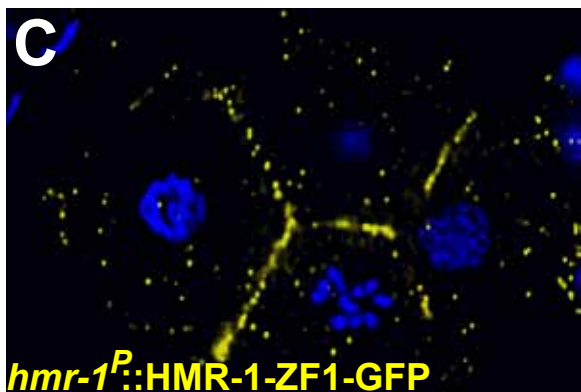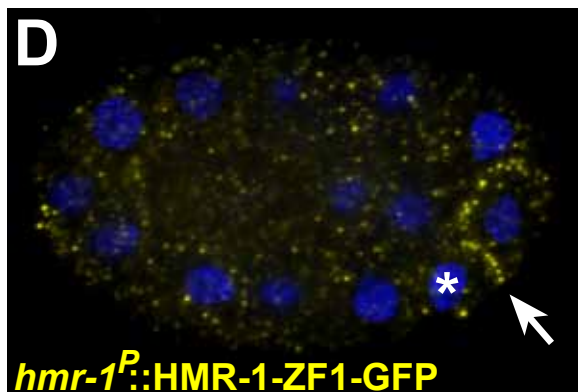

Supplement: supp_dev.079863_DEV079863FigS5.pdf [file supp_dev.079863_DEV079863FigS5.pdf]
